# Supplementary material for: A Multigene Phylogeny of Native American Hawkweeds (Hieracium Subgen. Chionoracium, Cichorieae, Asteraceae): Origin, Speciation Patterns, and Migration Routes
Source: MDPI journal article supplement (doi:10.3390/plants11192584), 2022-09-30
Supplement: s1 [file s1]

**TABLE S2. Classification and distribution of *Hieracium* subgen. *Chionoracium* species.** *Hieracium umbellatum* and *H. canadense* of subgen. *Hieracium*, which occur (also) in North America are included as well. Sectional classification is shown after the species name; species assigned to the same section are in matching colors.

| Species                                                             | Distribution                                                                   |
|---------------------------------------------------------------------|--------------------------------------------------------------------------------|
| <i>H. albiflorum</i> ( <i>Stenotheca</i> )                          | western North America with a few outposts in central and eastern North America |
| <i>H. antarcticum</i> ( <i>Aurelliformia</i> )                      | southern Chile and Argentina                                                   |
| <i>H. argutum</i> ( <i>Stenotheca</i> )                             | California                                                                     |
| <i>H. aff. asplundii</i>                                            | Bolivia                                                                        |
| <i>H. bolanderi</i> ( <i>Cynoglossoidea</i> )                       | Oregon, California and Mexico (Baja California)                                |
| <i>H. canadense</i>                                                 | Canada, northern U.S.A.                                                        |
| <i>H. carneum</i> ( <i>Crepidispermum</i> )                         | Arizona, New Mexico, Texas, northern Mexico                                    |
| <i>H. fendleri</i> ( <i>Crepidispermum</i> )                        | southwestern U.S.A., Mexico, rare in Guatemala                                 |
| <i>H. frigidum</i> ( <i>Aurelliformia</i> )                         | Colombia, Ecuador, Venezuela                                                   |
| <i>H. glaucifolium</i> ( <i>Piloselliformia</i> )                   | southern Chile and Argentina                                                   |
| <i>H. gracile</i> ( <i>Aurelliformia</i> )                          | western Canada, western U.S.A.                                                 |
| <i>H. gronovii</i> ( <i>Stenotheca</i> )                            | eastern and central North America, Caribbean                                   |
| <i>H. cf. guatemalense</i>                                          | Guatemala                                                                      |
| <i>H. horridum</i> ( <i>Cynoglossoidea</i> )                        | California, Oregon, Nevada                                                     |
| <i>H. irasuense</i> ( <i>Thyrsoidea</i> )                           | central America                                                                |
| <i>H. longiberbe</i> ( <i>Cynoglossoidea</i> )                      | Oregon, Washington                                                             |
| <i>H. longipilum</i> ( <i>Cynoglossoidea</i> )                      | central and eastern U.S.A., Quebec                                             |
| <i>H. mexicanum</i> ( <i>Thyrsoidea</i> )                           | southern Mexico, Guatemala                                                     |
| <i>H. patagonicum</i> ( <i>Piloselliformia</i> )                    | southern Chile and Argentina, Falkland Islands                                 |
| <i>H. scabrum</i> ( <i>Stenotheca</i> )                             | southeastern Canada, eastern U.S.A.                                            |
| <i>H. scouleri</i> var. <i>albertinum</i> ( <i>Cynoglossoidea</i> ) | western Canada, western U.S.A.                                                 |
| <i>H. scouleri</i> var. <i>scouleri</i> ( <i>Cynoglossoidea</i> )   | western Canada, western U.S.A.                                                 |
| <i>H. stachyoideum</i> ( <i>Mandonia</i> )                          | Bolivia, northern Argentina                                                    |
| <i>H. trichodontum</i> ( <i>Aurelliformia</i> )                     | Bolivia                                                                        |
| <i>H. triste</i> ( <i>Aurelliformia</i> )                           | Aleutian Islands, Alaska, western Canada, Russian Far East                     |
| <i>H. umbellatum</i>                                                | Europe, Asia, North America                                                    |
| <i>H. venosum</i> ( <i>Stenotheca</i> )                             | eastern North America with a few outposts in central North America and Alaska  |
