# Supplementary material for: A Multigene Phylogeny of Native American Hawkweeds (Hieracium Subgen. Chionoracium, Cichorieae, Asteraceae): Origin, Speciation Patterns, and Migration Routes
Source: MDPI journal article supplement (doi:10.3390/plants11192584), 2022-09-30
Supplement: s1 [file s1]

**TABLE S3. Log marginal likelihoods and median age estimates for the Hieraciinae node**

| Combination number | Ln(BF) | Log marginal likelihood | SD  | H   | Branch rate model | Tree branching model | Site model       | Hieraciinae age estimate (mya) |
|--------------------|--------|-------------------------|-----|-----|-------------------|----------------------|------------------|--------------------------------|
| 1                  | -      | -13802                  | 2.6 | 599 | ORC-LN            | B&D                  | GTR+ $\Gamma$ +I | 7.5 [3.9–12.3]                 |
| 2                  | 5      | -13807                  | 2.6 | 607 | UCLN              | B&D                  | GTR+ $\Gamma$ +I | 7.6 [4.21–12.1]                |
| 3                  | 6      | -13808                  | 2.6 | 617 | UCED              | B&D                  | GTR+ $\Gamma$ +I | 8.5 [3.4–15.3]                 |
| 4                  | 7      | -13809                  | 2.7 | 609 | UCLN              | Y                    | GTR+ $\Gamma$ +I | 8.3 [4.5–13.2]                 |
| 5                  | 9      | -13811                  | 2.6 | 611 | ORC-LN            | Y                    | GTR+ $\Gamma$ +I | 8.1 [4.4–13.0]                 |
| 6                  | 18     | -13820                  | 2.6 | 630 | UCED              | B&D                  | average          | 8.8 [3.4–15.6]                 |
| 7                  | 19     | -13821                  | 2.1 | 630 | UCED              | Y                    | GTR+ $\Gamma$ +I | 10.2 [4.9–16.7]                |
| 8                  | 21     | -13823                  | 2.6 | 599 | ORC-LN            | B&D                  | average          | 7.6 [4.1–11.8]                 |
| 9                  | 25     | -13827                  | 2.6 | 605 | UCLN              | B&D                  | average          | 7.6 [4.3–12.4]                 |
| 10                 | 29     | -13831                  | 2.6 | 608 | UCLN              | Y                    | average          | 8.2 [4.6–13.3]                 |
| 11                 | 29     | -13831                  | 2.6 | 609 | ORC-LN            | Y                    | average          | 8.1 [4.4–13.1]                 |
| 12                 | 30     | -13832                  | 2.7 | 642 | UCED              | Y                    | average          | 10.5 [5.4–16.9]                |
| 13                 | 39     | -13841                  | 2.6 | 551 | STRICT            | B&D                  | GTR+ $\Gamma$ +I | 5.6 [4.1–7.5]                  |
| 14                 | 47     | -13849                  | 2.4 | 557 | STRICT            | Y                    | GTR+ $\Gamma$ +I | 5.7 [4.3–7.8]                  |
| 15                 | 55     | -13857                  | 2.6 | 567 | STRICT            | Y                    | average          | 5.8 [4.3–7.8]                  |
| 16                 | 56     | -13858                  | 2.6 | 551 | STRICT            | B&D                  | average          | 5.6 [4.1–7.4]                  |

The computations were performed using nested sampling implementation from the NS v1.1.0 plug-in for BEAST2, with a MCMC chain length of  $50 \times 10^6$  generations, a subchain length of 10000, an epsilon value of  $10^{-6}$  and 90 particles. We report estimates for the likelihood and its standard deviation (SD). The value of the information parameter (H) was used to assess the number of particles required for achieving sufficient discriminatory power to obtain reliable evidence in favour of one of the models combination. ESS were  $>1000$  in every analysis. Competing combinations are ordered by decreasing likelihood. The Bayes factor (BF) is computed as the difference in marginal likelihood with the favoured combination. The combinations differ according to the components of the likelihood model, namely the branch rate model (UCLN, UCED, STRICT, ORC-LN clocks), the branching model (Yule [Y], birth-death [B&D] processes) and the site model (GTR +  $\Gamma$  + I, model averaging [average] nucleotide substitution models). We interpret a Ln(BF) value above 5 to provide an overwhelming support for one combination over the competing alternative. Estimates for the Hieraciinae divergence are the median ages and 95% Highest Posterior Density (HPD).
