# Supplementary material for: A Multigene Phylogeny of Native American Hawkweeds (Hieracium Subgen. Chionoracium, Cichorieae, Asteraceae): Origin, Speciation Patterns, and Migration Routes
Source: MDPI journal article supplement (doi:10.3390/plants11192584), 2022-09-30
Supplement: s1 [file s1]

**Table S5: Overview of markers, datasets, and phylogenetic analyses**

| <b>Marker</b>                      | <b>No. of characters<br/>(coded indels)<sup>1</sup></b> |       | <b>No. of parsimony<br/>informative<br/>characters (%)</b> |        | <b>BA Model AIC<br/>(million<br/>generations)</b> | <b>ML Model AIC</b> |
|------------------------------------|---------------------------------------------------------|-------|------------------------------------------------------------|--------|---------------------------------------------------|---------------------|
| ptDNA (combined)                   | 2281                                                    | (81)  | 106                                                        | (4.6)  | TVM+I+G (1.5)                                     | TVM+F+I+G4          |
| ITS                                | 715                                                     | (3)   | 99                                                         | (13.8) | GTR+I+G (2)                                       | GTR+F+I+G4          |
| ETS                                | 575                                                     | (7)   | 92                                                         | (16.0) | TVM+G (1)                                         | TVM+F+G4            |
| ITS+ETS (combined)                 | 1290                                                    | (10)  | 191                                                        | (14.8) | GTR+I+G (1)                                       | GTR+F+I+G4          |
| 5S-NTS                             | 275                                                     | (23)  | 77                                                         | (28.0) | TVMef+G (2)                                       | TPM2u+F+G4          |
| <i>gsh1</i>                        | 1182                                                    | (142) | 234                                                        | (19.8) | GTR+I+G (1)                                       | GTR+F+I+G4          |
| <i>gsh1</i> (paralogs/pseudogenes) | 887                                                     | (55)  | 93                                                         | (10.5) | TVM+I (2.5)                                       | GTR+F+I+G4          |
| <i>sqs</i>                         | 1408                                                    | (102) | 291                                                        | (20.7) | TVM+I+G (2)                                       | TVM+F+I+G4          |
| combined dataset                   | 6085                                                    | (223) | 432                                                        | (7.1)  | GTR+I+G (1)                                       | TIM+F+I+G4          |

<sup>1</sup> The number of coded indels is included in the number of characters. BA – Bayesian analysis; ML – Maximum Likelihood; AIC – Akaike Information Criterion
