# Supplementary material for: A Multigene Phylogeny of Native American Hawkweeds (Hieracium Subgen. Chionoracium, Cichorieae, Asteraceae): Origin, Speciation Patterns, and Migration Routes
Source: MDPI journal article supplement (doi:10.3390/plants11192584), 2022-09-30
Supplement: s1 [file s1]

**TABLE S1. Genome size measurements of native American hawkweeds**

| Species                | Accession               | 2n | Average 2C [pg] | 2C range [pg]      |
|------------------------|-------------------------|----|-----------------|--------------------|
| <i>H. albiflorum</i>   | H908_1                  |    | 7.517           | 7.515–7.521        |
|                        | H908_2                  |    | 7.542           | 7.493–7.591        |
|                        | H908_3                  |    | 7.558           | 7.537–7.580        |
|                        | <b>H908 (all)</b>       |    | <b>7.539</b>    | <b>7.493–7.591</b> |
| <i>H. canadense</i>    | <b>canad</b>            |    | <b>12.332</b>   | –                  |
| <i>H. carneum</i>      | H.carneum.1             |    | 9.515           | 9.416–9.606        |
|                        | H.carneum.2             |    | 9.533           | 9.432–9.584        |
|                        | H.carneum.3             |    | 9.531           | 9.454–9.595        |
|                        | <b>H. carneum (all)</b> |    | <b>9.526</b>    | <b>9.416–9.606</b> |
| <i>H. guatemalense</i> | GUA/2 + Z               | 18 | 9.227           | 9.193–9.253        |
|                        | GUA/3 + Z               |    | 9.209           | 9.188–9.231        |
|                        | GUA/4 + Z               |    | 9.217           | 9.160–9.269        |
|                        | GUA/5 + Z               | 18 | 9.262           | 9.193–9.318        |
|                        | GUA/6 + Z               |    | 9.248           | 9.236–9.264        |
|                        | <b>GUA (all)</b>        |    | <b>9.233</b>    | <b>9.160–9.318</b> |
| <i>H. mexicanum</i>    | <b>H903 (8 plants)</b>  |    | <b>10.14</b>    | <b>10.09–10.23</b> |
| <i>H. scabrum</i>      | 1002/2 + Z              | 18 | 9.922           | 9.861–9.959        |
|                        | 1002/4 + Z              |    | 9.942           | 9.926–9.959        |
|                        | <b>1002 (all)</b>       |    | <b>9.932</b>    | <b>9.861–9.959</b> |

Accession: several plants from the same population per species, individual measurements and average for the population (3 measurements, if not indicated otherwise); 2n – chromosome counts ( $2n = 2x = 18$ ). The accession of *H. canadense* is triploid according to its genome size (one measurement only).
