# Supplementary material for: A Multigene Phylogeny of Native American Hawkweeds (Hieracium Subgen. Chionoracium, Cichorieae, Asteraceae): Origin, Speciation Patterns, and Migration Routes
Source: MDPI journal article supplement (doi:10.3390/plants11192584), 2022-09-30
Supplement: s1 [file s1]

**Table S4. Details of sample origins.**

| Species                                             | Identifier           | Origin and voucher                                                                                                                                                                                                                                      |
|-----------------------------------------------------|----------------------|---------------------------------------------------------------------------------------------------------------------------------------------------------------------------------------------------------------------------------------------------------|
| <b><i>Hieracium</i> subgen. <i>Chionoracium</i></b> |                      |                                                                                                                                                                                                                                                         |
| <i>Hieracium albidiflorum</i>                       | H908<br>albifl       | USA: Idaho, Bouner County, Talache, leg. L.M. Wilson July 2001 (PRA – plants cultivated from seeds)<br>B&T World Seed, <a href="http://www.b-and-t-world-seeds.com/index.html">http://www.b-and-t-world-seeds.com/index.html</a>                        |
| <i>H. antarcticum</i>                               | ant.2                | Chile: Patagonia National Park, Torres del Paine, leg. F. Müller 2000 (GLM 155579)                                                                                                                                                                      |
| <i>H. argutum</i>                                   | H905                 | USA: California, Monterey County, Big Sur, leg. L.M. Wilson 20 June 2002 (PRA – plants cultivated from seeds)                                                                                                                                           |
| <i>H. aff. asplundii</i>                            | asp.Bol.2            | Bolivia: Prov. Murillo, Dpto La Paz, Beck 14779 (M)                                                                                                                                                                                                     |
| <i>H. bolanderi</i>                                 | 4475                 | USA: California, Del Norte County, leg. Roche & Korfhage R-2024 (ID)                                                                                                                                                                                    |
| <i>H. carneum</i>                                   | H.carneum.1          | USA: Arizona, Pima Co., Mt. Lemon, leg. L.M. Wilson June 2004 (PRA – plants cultivated from seeds)                                                                                                                                                      |
| <i>H. fendleri</i>                                  | FEND1                | USA: Arizona, Tucson, Rincon Mts, leg. L.M. Wilson June 2004 (PRA – plants cultivated from seeds)                                                                                                                                                       |
| <i>H. frigidum</i>                                  | Chi.Ecu              | Ecuador: Prov. Tungurahua, P.N. Llangantes, leg. Z. Palice 2003, det. F. Schuhwerk (PRA)                                                                                                                                                                |
| <i>H. glaucifolium</i>                              | bg53                 | Chile: leg. J. Grau (M)                                                                                                                                                                                                                                 |
| <i>H. gracile</i>                                   | gracile              | USA: Idaho, Shoshone County, Freezout Mountain, leg. L.M. Wilson 22 August 2006 (PRA – plants cultivated from seeds)                                                                                                                                    |
| <i>H. gronovii</i>                                  | 4371                 | USA: Michigan, Kalamazoo County, leg. L.M. Wilson s.n. (ID)                                                                                                                                                                                             |
| <i>H. cf guatemalense</i>                           | GUA3                 | Guatemala: Quetzaltenango, Santa Maria volcano, leg. K. Krak August 2005 (PRA)                                                                                                                                                                          |
| <i>H. horridum</i>                                  | 4781                 | USA: California, Mono County, leg. unknown (WTU)                                                                                                                                                                                                        |
| <i>H. irasuense</i>                                 | 4772                 | Mexico: Chiapas, leg. Villasenor et al. s.n. (MSC)                                                                                                                                                                                                      |
|                                                     | ira2-9               | Guatemala: San Marcos, Tajumulco volcano, near the summit, leg. K. Krak August 2005, det. F. Schuhwerk (PRA)                                                                                                                                            |
| <i>H. longiberbe</i>                                | 4783                 | USA: Oregon, Multnomah County, Oeneta Gorge, leg. L.M. Wilson 8 July 2004 (ID)                                                                                                                                                                          |
| <i>H. longipilum</i>                                | 4376                 | USA: Wisconsin, Adams County, leg. Cochrane 14234 (ID)                                                                                                                                                                                                  |
| <i>H. mexicanum</i>                                 | 1093_TA<br>4773      | Guatemala: San Marcos, Tajumulco volcano, leg. K. Krak August 2005, det. F. Schuhwerk (PRA)<br>Mexico: Mexico, leg. Soule 1393 (MSC)                                                                                                                    |
| <i>H. patagonicum</i>                               | pat.Chi              | Chile: Refugio Redeto, cultivated at Botanical Garden Munich, culture no. 94-55, voucher from 25.10.1995 (M)                                                                                                                                            |
| <i>H. scabrum</i>                                   | H911<br>1002         | USA: Michigan I, leg. L.M. Wilson, s.d. (PRA – plants cultivated from seeds)<br>USA: Michigan II, leg. L.M. Wilson, s.d. (PRA – plants cultivated from seeds)                                                                                           |
| <i>H. scouleri</i> var. <i>albertinum</i>           | H903                 | USA: Idaho, Benewah County, Lindstrom, leg. L.M. Wilson 6 August 2002 (PRA – plants cultivated from seeds)                                                                                                                                              |
| <i>H. scouleri</i> var. <i>scouleri</i>             | 4788                 | USA: Idaho, Idaho County, leg. unknown (ID)                                                                                                                                                                                                             |
| <i>H. stachyoideum</i>                              | sty.Bol              | Bolivia: Prov. Murillo, Dpto Cochabamba, leg. Beck 14565 & Seidel (M)                                                                                                                                                                                   |
| <i>H. trichodontum</i>                              | tri.Bol              | Bolivia: Prov. Camacho, Dpto La Paz, leg. Beck 4233 (M)                                                                                                                                                                                                 |
| <i>H. triste</i>                                    | 4792                 | USA: Alaska, Skagway, leg. unknown (WTU)                                                                                                                                                                                                                |
| <i>H. venosum</i>                                   | venosum              | USA: Michigan, leg. Reznicek 11266 (MICH, GLM 141161)                                                                                                                                                                                                   |
| <b><i>Hieracium</i> subgen. <i>Hieracium</i></b>    |                      |                                                                                                                                                                                                                                                         |
| <i>Hieracium alpinum</i>                            | alp.Ukr<br>alp.Boa.2 | Ukraine: Chornohora Mts. (Carpathians), Polonina Breskulska ridge, 23 July 2003, leg. P. Mráz & J. Chrtek, 0038/2003 (PRA)<br>Romania: Munții Rodnei, glacial circle on the NE slopes of Mt. Pietrosul Mare, 5 July 2001, leg. P. Mráz, 0187/2001 (PRA) |
| <i>H. canadense</i>                                 | canad                | B&T World Seed, <a href="http://www.b-and-t-world-seeds.com/index.html">http://www.b-and-t-world-seeds.com/index.html</a> (GLM 157756)                                                                                                                  |
| <i>H. eriophorum</i>                                | 1221/1<br>1222/2     | France: dépt. Landes, Labenne: plage de Labenne Océan Sud, 27 September 2006, leg. E. Forey, 1221/2006 (PRA)<br>France: dépt. Landes, Seignosse-le-Penon, plage de Estagnols Seignosse, 27 September 2006, leg. E. Forey, 1222/2006 (PRA)               |
| <i>H. intybaceum</i>                                | inb.Kaer<br>1069/1   | Austria: Kärnten, Turracher Höhe, S. Jagalski 4 (M)<br>Italy: Trentino, Alto Adige, Passo del Tonale, 31 August 2005, leg. J. Chrtek & P. Mráz, 1069/2005 (PRA)                                                                                         |

|                             |            |                                                                                                                        |
|-----------------------------|------------|------------------------------------------------------------------------------------------------------------------------|
| <i>H. kittanae</i>          | 1228/2     | Bulgaria: Central Rhodope Mts., Trigrad gorge, September 2005, leg. P. Ignatova, 1228/2005 (PRA)                       |
| <i>H. laniferum</i>         | lanif2     | Spain: prov. Tarragona, la Sénia, 4 June 2011, leg. J. Chrtek (PRA)                                                    |
| <i>H. lucidum</i>           | H. lucidum | Italy: Sicily, distr. Palermo, Sferracavallo, 11 April 2007, leg. J. Chrtek et al., 0054/2007 (PRA)                    |
| <i>H. petrovae</i>          | 1229       | Bulgaria: Central Rhodope Mts., Trigrad gorge, 15 October 2005, leg. V. Vladimirov, 1229/2005 (PRA)                    |
| <i>H. porrifolium</i>       | 1052/9     | Austria: Kärnten, Karawanks, Bad Eisenkappel, 26 July 2005, leg. J. Chrtek & P. Mráz, 1052/2005 (PRA)                  |
| <i>H. prenanthoides</i>     | 1252       | France: dépt. Hautes Alpes, La Grave, below the village, June 2003, leg. P. Mráz, 1252/2003 (PRA)                      |
| <i>H. recoderi</i>          | 1174/4     | Spain: Catalunya, prov. Barcelona, Berga, 24 July 2006, leg. J. Chrtek, 1174/2006 (PRA)                                |
| <i>H. sparsum</i>           | 1251/1     | Bulgaria: Sofia, Vitoša Mts., NE slope of Mt. Vitoša, 23 June 2006, leg. F. Krahulec & A. Krahulcová, 1251/2006 (PRA)  |
|                             | spa.sst.2  | Bulgaria: Pirin Mts., Mt. Vihren, garden culture Z. Szeląg, 0034/2006 (PRA)                                            |
| <i>H. stelligerum</i>       | 1233/1     | France: dépt. Ardèche, Vallon Pont d'Arc, October 2006, leg. P. Mráz, 1233/2006 (PRA)                                  |
| <i>H. tomentosum</i>        | 1066/8     | France: dépt. Alpes Maritimes, Roya Valley, Tende, 28 August 2005, leg. J. Chrtek & P. Mráz, 1066/2005 (PRA)           |
| <i>H. transylvanicum</i>    | tra.Boa    | Romania: Munții Rodnei, path from the village of Borșa to Mt. Pietrosul Mare, July 2001, leg. P. Mráz (PRC)            |
|                             | 1077/7     | Ukraine: Oblast Zakarpatska, Marmaroski Alps, Mt. Berlebachka, 19 September 2005, leg. J. Zahradníček, 1077/2005 (PRA) |
| <i>H. umbellatum</i>        | 1021/1     | Poland: Województwo pomorskie, Baltic coast, Jantar, 27 June 2002, leg. Z. Szeląg, 1021/2002 (PRA)                     |
|                             | um.AM.1    | Germany: Upper Lusatia, SE Schöna-Berzdorf, slagheap, 20 August 2003, leg. S. Bräutigam (GLM 46889)                    |
| <i>H. vranceae</i>          | Hvran_1-1  | Romania: Vrancea, Cheile Tișitei, 28 August 2013, leg. L. Filipaş & M. Bărbos (PRC)                                    |
| <i>Hispidella hispanica</i> | His.his.2  | Spain: Sierra de Guadarrama, leg. J. Pizarro & C. Navarro (PR, no CN 2460)                                             |
| <i>Pilosella argyrocoma</i> | agy.Gra    | Spain: prov. Granada, cultivated in Botanic Garden Munich, H. Merxmüller & W. Gleisner, culture H11                    |
| <i>P. lactucella</i>        | lac.Jon.1  | Germany: Jonsdorf, Oberlausitz, parking lot, June 1999, leg. S. Bräutigam (GLM 140619)                                 |
| <i>P. pseudopilosella</i>   | TU308/2    | Spain: Sierra Nevada, between Granada and Pradolano, 2 June 2008, leg. T. Urfus, T. Urfus 308/2 (PRA)                  |
