# Supplementary material for: A Multigene Phylogeny of Native American Hawkweeds (Hieracium Subgen. Chionoracium, Cichorieae, Asteraceae): Origin, Speciation Patterns, and Migration Routes
Source: Plants (Basel). 2022 Sep 30;11(19):2584. doi: 10.3390/plants11192584 (PMC9571344; doi:10.3390/plants11192584)
Supplement: Supplementary file 1 [file plants-11-02584-s001.zip]

Archive with 8 entries (8 files):
- Figure S1_ITS_Plants.pdf
- Figure S2_ETS_Plants.pdf
- Figure S3_gsh-paralogs_Plants.pdf
- Table S1_genome_sizes_Plants.pdf
- Table S2_classification_distribution_Plants.pdf
- Table S3_dating_models_Plants.pdf
- Table S4_sample_origins_Plants.pdf
- Table S5_marker-characteristics_Plants.pdf
